# Cochrane Update

## Managing the production of a Cochrane systematic review

Philip R.A. Baker<sup>1</sup>, Daniel P. Francis<sup>1</sup>, Belinda J. Hall<sup>2</sup>, Jodie Doyle<sup>2</sup>, Rebecca Armstrong<sup>2</sup>

<sup>1</sup>Department of Epidemiology, Central Regional Services, Queensland Health, Brisbane, Queensland, Australia

<sup>2</sup>Cochrane Public Health Review Group, McCaughey Centre, VicHealth Centre for the Promotion of Mental Health and Community Wellbeing, University of Melbourne, 207 Bouverie Street, Parkville, VIC 3010, Australia

Address correspondence to Philip R. A. Baker, E-mail: philip\_baker@health.qld.gov.au

### Background

Undertaking a Cochrane systematic review can be an incredibly rewarding experience. It is however a challenging and time-consuming task. The *Cochrane Handbook for Systematic Reviews of Interventions*<sup>1</sup> provides an essential resource to help reviewers navigate the often complex methodological issues of systematic review research. Additional guidelines have been developed for those undertaking reviews of public health topics,<sup>2</sup> and Cochrane Centres throughout the world offer invaluable training opportunities. This emphasis on training and methodological rigour has helped Cochrane reviews become one of the most respected sources of synthesized research available.

Even with the assistance available, however, many authors with good intentions register titles and prepare protocols but fail to publish the completed review. Data extracted from Cochrane's Information Management System (*Archie*) in June 2010 showed that there were 1,301 titles registered more than two years ago that have not been published as a full review.<sup>3</sup> Of these registered titles, 697 have had protocols published (25 are no longer active) while 604 have not even progressed to this stage (154 are no longer active). There are also 146 protocols that have been published for more than two years without being converted into completed reviews. These registered titles and protocols that have not yet progressed to a completed review represent a significant amount of time and energy invested by review authors, Cochrane editorial staff and, in some cases, external referees.

While there may be a range of potential reasons for a title not to progress to a completed review, a recent study identified time and author communication as the major barriers hindering the completion of Cochrane reviews.<sup>4</sup> To help overcome these obstacles we suggest looking to the tools and techniques of project management and have also highlighted some aspects specific to the review process which

will contribute to enhanced efficiency, and the timely completion of these reviews.

Project management 'is a discipline of planning, organizing and managing resources to bring about the successful completion of specific goals'.<sup>5</sup> The purpose of project management is to foresee or predict risks, and to plan, organize, and manage activities so that projects are successfully completed in spite of the risks. There are various approaches to project management; however the critique of these is not the purpose of this paper. Nor is it our purpose to rewrite the processes of conducting a review. Rather we hope to highlight some tools available and to promote the consideration of project management techniques to improve review management, collaborator communication, stakeholder engagement and ultimately the prospects of review completion.

### Using project management tools and resources in the review process

The process of producing a Cochrane review may be divided into four phases of project management: *concept, planning and definition, implementation* and *finalization*. The *concept phase* includes assembling the authorship team and registration of the proposed title with the appropriate Cochrane Review Group. The *planning and definition phase* of the review includes protocol development. From the protocol, the components and tasks for each stage of the review should be identified and clearly defined. The responsibilities

Philip R.A. Baker, Director

Daniel P. Francis, Advanced Epidemiologist

Belinda J. Hall, Communications and Liaison Fellow

Jodie Doyle, Managing Editor

Rebecca Armstrong, Editorial and Methods Advisor

for each task can be allocated to members of the author team. At this stage, a plan for training and resource assessment may be useful. A budget may be formulated which should include the time and resources each author can commit to the review process. It is also important to agree on subsequent publications, commitment to involvement in updating the review and the order of authorship during this phase. The *implementation phase* meshes with all aspects of review production as outlined in the published protocol. The *finalization stage* is the write-up and publication of the review itself, managing feedback from the published review and making plans for future updates.

Project management packages and software are available for purchase, although many tools can be downloaded free from the internet. In Table 1 we offer some suggestions of simple project management tools and templates that authors may find useful. Much of the information captured on these templates can be used when planning and conducting the review.

## Establishing effective communication strategies

Cochrane reviews have some specific challenges for which the application of project management techniques and tools may help to overcome. For example, reviews often involve

authors from multiple settings, disciplines and countries, working in ‘virtual’ teams. It is common for author teams to include individuals who have never met in person, but have been introduced by the editorial team, or through the authors sourcing out experts in the field (through the internet or via professional mailing lists, for example). For the team to function, an enormous amount of good will, trust and commitment is required by all involved, along with the capacity to communicate effectively.

It is important to establish effective communication strategies at the onset of the project. It may be useful to develop a documented communications plan. This helps prepare for the challenges that having review authors in different time zones, distant locations and even different languages, brings.

While the tools of project management provide documentation that serve as valuable records of decisions, personal communication between collaborators is a necessary and essential part of any team. Email provides a quick means of communication, but has recognized limitations. Often it may be more effective to discuss issues verbally. The advent of resources of voice over internet protocol and video services, such as Skype video, offer cheap means of communication. Video call functions increase the interaction between users. Conference calls help set dates for work to be done and if managed effectively, can be used to build team comradery. The annual Cochrane Colloquium also provides convenient meeting opportunities.

It is also useful if members of the team have access to the project’s management resources and templates. File sharing software such as Lotus Quickr, supported by some universities, provides a place where project documentation, endnote files, included data extraction forms and quality assessment tools can be readily accessed by team members. Table 2 provides examples and links to some of the resources available. Additionally, Robin Good’s Collaborative Map ([www.mindmeister.com/12213323](http://www.mindmeister.com/12213323))<sup>6</sup> identifies online resources for collaboration.

## Stakeholder engagement—management of a Review Advisory Group

In addition to tools that assist with time management and communication, it is worth considering aspects of the review process itself that are likely to enhance efficiency and streamline activities. Benefits of stakeholder engagement include increased relevance of review topic and methodology to potential end-users. An excellent way of involving stakeholders is to establish a Review Advisory Group (RAG) at the outset of protocol development. Members of a RAG can help author teams outline the parameters of

**Table 1** Template and tools for project management

| Template/Tools                     | Description                                                                                                                                                                                         |
|------------------------------------|-----------------------------------------------------------------------------------------------------------------------------------------------------------------------------------------------------|
| Task assignment template           | Used to itemize tasks and allocate them among the review team                                                                                                                                       |
| Project schedules and Gantt charts | Indicates what activities will be undertaken and when they will occur                                                                                                                               |
| Issues register                    | Documents issues that arise and the action required. These may include changes to the protocol and communications with editors                                                                      |
| Process documentation              | Describes how information and processes will flow (e.g. the process from searching to screening for included studies)                                                                               |
| Learning registry                  | Documents the important learnings of a review. This may later be used in the discussion section of the review or even subsequent publications                                                       |
| Communications strategy            | Describes how the team will communicate, including frequency and mode of conference calls, and the contact details of authors, editors and advisory group members. This is discussed further below. |

**Table 2** Resources for facilitating good communication between team members

| Resource                                               | Examples                                                                                                                                                                |
|--------------------------------------------------------|-------------------------------------------------------------------------------------------------------------------------------------------------------------------------|
| Meeting planning tools                                 | www.agreedate.com, www.timeanddate.com/worldclock/meeting.html                                                                                                          |
| Voice and video communication                          | Skype, www.skype.com<br>Google Talk, www.google.com/talk                                                                                                                |
| Sharing files                                          | Drop.io (free file sharing)<br>www.dropbox.com (file sync/<br>file sharing/online backup)<br>www.5.sendthisfile.com<br>Other: Lotus Quickr (replaces Lotus Quick Place) |
| Remote control of a PC to demonstrate or fix a problem | www.logmein.com, www.tightvnc.com, www.netviewer.com (also online conferencing)                                                                                         |

their proposed review, alerting reviewers to potential methodological issues, assisting with prioritization of outcomes for analysis and refinement of inclusion criteria for studies and populations. Careful consideration of such issues will help save time over the long term, particularly for reviews of complex interventions, such as those in public health. RAGs should comprise members from different parts of the world to ensure the review has relevance globally and could include a combination of consumers, content experts, policy-makers and practitioners. To ensure effective management and utilization of a RAG, it is recommended to formalize the process at the outset, considering aspects such as roles and responsibilities, anticipated workload, method of communication, frequency of consultation and timelines and ensuring agreement of these with the authors and RAG members. Communication strategies as mentioned previously can apply when managing information sharing and feedback amongst the RAG members and the authorship team.

## Conclusion

The preparation of a Cochrane review is a complex and time-consuming process, and thus the need for initial planning by authors is imperative. Project management principles provide a good basis for both planning and managing the production of the review. Well-considered planning, management, effective communication and stakeholder engagement has the potential to improve timeliness and

completion rates of reviews, as well as enhancing the review experience of the author team.



**New Cochrane protocols and reviews of interest to health promotion and public health stakeholders from issues 4-6, 2010 of *The Cochrane Library* (\*denotes PHRG review/protocol)**

**Reviews**

- Bicycle helmet legislation for the uptake of helmet use and prevention of head injuries
- Caffeine for the prevention of injuries and errors in shift workers
- In-service training for health professionals to improve care of the seriously ill newborn or child in low- and middle-income countries
- Indoor residual spraying for preventing malaria
- Interventions to improve disposal of human excreta for preventing diarrhoea
- Interventions for improving the adoption of shared decision-making by healthcare professionals
- Legislative smoking bans for reducing second-hand smoke exposure, smoking prevalence and tobacco consumption
- Supplementary vitamin E, selenium, cysteine and riboflavin for preventing kwashiorkor in preschool children in developing countries
- Strategies for communicating contraceptive effectiveness
- Support during pregnancy for women at increased risk of low birthweight babies

**Protocols**

- Customized versus population-based growth charts as a screening tool for detecting small for gestational age infants in low-risk pregnant women
- Interventions for increasing fruit and vegetable consumption in preschool aged children
- Interventions for preventing influenza: an overview of Cochrane systematic reviews
- The effect of financial incentives on the quality of health care provided by primary care physicians
- \*Workplace-based organizational interventions to prevent and control obesity by improving dietary intake and/or increasing physical activity

## Funding

The Cochrane Public Health Review Group acknowledges the support of the Victorian Health Promotion Foundation (VicHealth) and Queensland Health who provided the authors time to undertake Cochrane Collaboration activities. No endorsement is given to the resources identified in this paper.

## References

- 1 Higgins J, Green S. *Cochrane Handbook for Systematic Reviews and Interventions*. Chichester: John Wiley & Sons Ltd, 2008.
- 2 Armstrong R, Waters E, Jackson N *et al*. *Guidelines for Systematic Reviews of Health Promotion and Public Health Interventions. Version 2*. Melbourne: Australia: Melbourne University, 2007.
- 3 Cumpston M. 'Personal communication: data extracted from Archie 23 June 2010: status of registered review titles', 2010.
- 4 Gillies D, Maxwell H, New K *et al*. 'A collaboration-wide survey of Cochrane authors'. The Cochrane Collaboration, 2009.
- 5 Cleveland D, Gareis R. *Global Project Management Handbook: Planning, Organising and Controlling International Projects*. New York: McGraw-Hill, 2006.
- 6 Good R. 'Best Online Collaboration Tools 2010—Robin Good's Collaborative Map'. 2010 (July 19 2010, date last accessed).
